# Supplementary material
Source: PubMed Central journal article supplement (PMC2724716)
Supplement: supp_180_3_239__1.pdf [file supp_180_3_239__1.pdf]

## **Integrating Health Status and Survival Data: The Palliative Effect of Lung Volume Reduction Surgery**

Roberto Benzo, MD, MSc<sup>1</sup>, Max H. Farrell<sup>2</sup>, Chung-Chou H. Chang, PhD<sup>2,4</sup>, Fernando J. Martinez MD MPH<sup>3</sup>, Robert Kaplan PhD<sup>5</sup>, John Reilly MD<sup>11</sup>, Gerard Criner MD<sup>6</sup>, Robert Wise MD<sup>7</sup>, Barry Make MD<sup>8</sup>, James Luketich MD<sup>9</sup>, Alfred P. Fishman, MD<sup>10</sup>, Frank C Sciruba, MD<sup>11</sup> for the NETT Research Group\*.

<sup>1</sup> Division of Pulmonary and Critical Care Medicine, Mayo Clinic, Rochester, MN;

<sup>2</sup> Division of General Internal Medicine, Department of Medicine, School of Medicine, University of Pittsburgh, Pittsburgh, PA; <sup>3</sup> Internal Medicine, Division of Pulmonary & Critical Care Medicine, University of Michigan, Ann Arbor, MI, <sup>4</sup> Department of

Biostatistics, Graduate School of Public Health, University of Pittsburgh, Pittsburgh, PA;

<sup>5</sup> Department of Health Services, University of California, Los Angeles, CA, <sup>6</sup> Division of Pulmonary & Critical Care Medicine, Temple University, Philadelphia, PA, <sup>7</sup> Division of Pulmonary & Critical Care Medicine, Johns Hopkins University, Baltimore, MD, <sup>8</sup>

Division of Pulmonary Sciences, National Jewish Medical Center and Research Center,

Denver, CO. <sup>9</sup> Division of Thoracic and Foregut Surgery, University of Pittsburgh,

Pittsburgh PA, <sup>10</sup> Department of Medicine, University of Pennsylvania, Philadelphia, PA,

<sup>11</sup> Division of Pulmonary and Critical Care Medicine, Department of Medicine, School of Medicine, University of Pittsburgh, Pittsburgh, PA

**Online Repository**

**Table E1. Total Score in St. George's Respiratory Questionnaire (SGRQ), Observed and Predicted Over Time**

| Year                                                                                      | All patients |            | Non “high risk” patients (NHR) |            | NHR and Upper-Lobe Emphysema (ULE) |            | NHR and ULE and Low Exercise |            | NHR and non-ULE and high Exercise |            | NHR and non-ULE and low Exercise |            |
|-------------------------------------------------------------------------------------------|--------------|------------|--------------------------------|------------|------------------------------------|------------|------------------------------|------------|-----------------------------------|------------|----------------------------------|------------|
|                                                                                           | Med Rx Group | LVRS Group | Med Rx Group                   | LVRS Group | Med Rx Group                       | LVRS Group | Med Rx Group                 | LVRS Group | Med RX Group                      | LVRS Group | Med Rx Group                     | LVRS Group |
| <b>Part A. Scores Observed</b>                                                            |              |            |                                |            |                                    |            |                              |            |                                   |            |                                  |            |
| 0                                                                                         | 53.6         | 52.5       | 53.2                           | 52.2       | 50.8                               | 51.2       | 57.0                         | 54.3       | 51.4                              | 48.2       | 55.5                             | 56.2       |
| 1                                                                                         | 55.8         | 41.7       | 55.1                           | 40.9       | 53.1                               | 38.4       | 59.5                         | 40.6       | 53.4                              | 40.8       | 56.8                             | 48.3       |
| 2                                                                                         | 55.9         | 44.1       | 55.3                           | 43.6       | 53.7                               | 41.5       | 59.0                         | 42.9       | 53.7                              | 45.6       | 57.8                             | 48.1       |
| 3                                                                                         | 55.7         | 45.8       | 55.4                           | 45.4       | 53.8                               | 41.7       | 58.6                         | 47.6       | 54.4                              | 45.8       | 59.3                             | 52.0       |
| 4                                                                                         | 56.1         | 45.8       | 55.5                           | 44.5       | 52.7                               | 41.6       | 61.9                         | 43.0       | 53.8                              | 48.2       | 80.6                             | 55.1       |
| 5                                                                                         | 53.7         | 44.5       | 53.7                           | 44.5       | 50.4                               | 42.2       | 65.3                         | 44.9       | 54.5                              | 47.4       | 49.4                             | 54.0       |
| <b>Part B. Scores Predicted by Mixed Models with Random Intercepts and Random Slopes</b>  |              |            |                                |            |                                    |            |                              |            |                                   |            |                                  |            |
| 0                                                                                         | 53.6         | 51.4       | 53.2                           | 51.1       | 50.8                               | 49.9       | 56.8                         | 53.3       | 51.3                              | 47.2       | 55.7                             | 55.3       |
| 1                                                                                         | 57.2         | 39.5       | 56.5                           | 38.5       | 54.3                               | 36.4       | 60.8                         | 37.3       | 54.2                              | 38.8       | 58.4                             | 45.9       |
| 2                                                                                         | 57.8         | 46.1       | 57.1                           | 45.2       | 54.8                               | 43.5       | 59.5                         | 43.9       | 57.1                              | 47.4       | 58.6                             | 48.5       |
| 3                                                                                         | 58.8         | 51.1       | 58.2                           | 50.3       | 56.3                               | 47.0       | 60.1                         | 51.4       | 57.4                              | 50.1       | 60.2                             | 57.5       |
| 4                                                                                         | 58.8         | 51.1       | 58.2                           | 50.3       | 56.3                               | 47.0       | 60.1                         | 51.4       | 57.4                              | 50.1       | 60.2                             | 57.5       |
| 5                                                                                         | 58.8         | 51.1       | 58.2                           | 50.3       | 56.3                               | 47.0       | 60.1                         | 51.4       | 57.4                              | 50.1       | 60.2                             | 57.5       |
| <b>Part C. Scores Predicted by Mixed Models with Random Intercepts (No Random Slopes)</b> |              |            |                                |            |                                    |            |                              |            |                                   |            |                                  |            |
| 1                                                                                         | 53.6         | 51.4       | 53.2                           | 51.1       | 50.8                               | 49.9       | 56.9                         | 53.3       | 51.3                              | 47.2       | 55.7                             | 55.3       |
| 2                                                                                         | 56.9         | 39.4       | 56.3                           | 38.4       | 54.1                               | 36.3       | 60.6                         | 37.3       | 54.1                              | 38.6       | 58.2                             | 46.0       |
| 3                                                                                         | 57.6         | 45.8       | 57.0                           | 45.0       | 54.7                               | 43.3       | 59.5                         | 43.7       | 56.8                              | 47.4       | 58.3                             | 48.3       |
| 4                                                                                         | 58.2         | 50.3       | 57.6                           | 49.6       | 55.9                               | 46.0       | 59.2                         | 50.8       | 56.8                              | 49.9       | 59.8                             | 57.2       |
| 5                                                                                         | 58.2         | 50.3       | 57.6                           | 49.6       | 55.9                               | 46.0       | 59.2                         | 50.8       | 56.8                              | 49.9       | 59.8                             | 57.2       |

NHR= patients without “high risk” of perioperative mortality; ULE= predominantly upper-lobe emphysema

Non-ULE= Non-upper-Lobe emphysema; Low exercise= low exercise capacity defined as less than 40w for males and less than 25 W for females in maximal cycle ergometry testing; High exercise= high exercise capacity; Med Rx = medical treatment; LVRS = lung volume reduction surgery.
